# Supplementary material for: A two-dimensional van der Waals CdS/germanene heterojunction with promising electronic and optoelectronic properties: DFT + NEGF investigations
Source: Royal Society of Chemistry journal article supplement (doi:10.1039/c7cp03388e), 2017-01-01
Supplement: c7cp03388e1.pdf [file c7cp03388e1.pdf]

## Supporting Information

# Two-Dimensional Van der Waals CdS/germanene Heterojunction with Promising Electronic and Optoelectronic Properties: DFT+ NEGF Investigations

K.Zheng, <sup>† a,b</sup> Q.Yang, <sup>† a,b</sup> C.J. Tan,<sup>a,b</sup> H.Y. Ye, <sup>\*a,b</sup> X.P. Chen,<sup>\*a,b</sup>

<sup>a)</sup> Key Laboratory of Optoelectronic Technology & Systems, Education Ministry of China,  
Chongqing University, Chongqing 400044, China

<sup>b)</sup> College of Optoelectronic Engineering, Chongqing University, Chongqing 400044, China

Correspondence authors: H.Y.Ye (huaiyuye@cqu.edu.cn) and X.P. Chen  
([xianpingchen@cqu.edu.cn](mailto:xianpingchen@cqu.edu.cn))

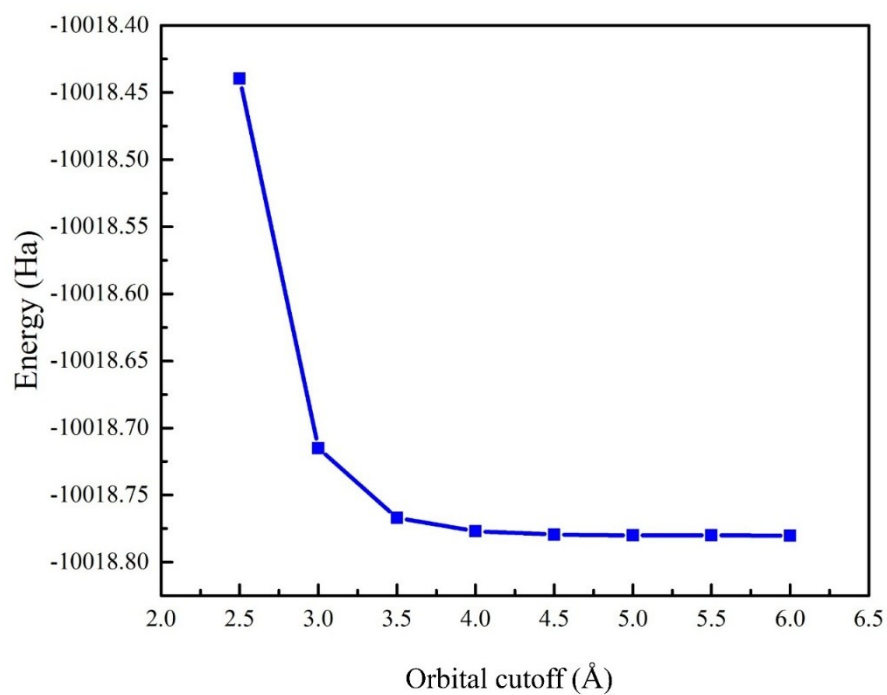

**Figure S1** Energy convergence with the orbital cutoff for CdS/germanene heterojunction with Dmol<sup>3</sup> package.

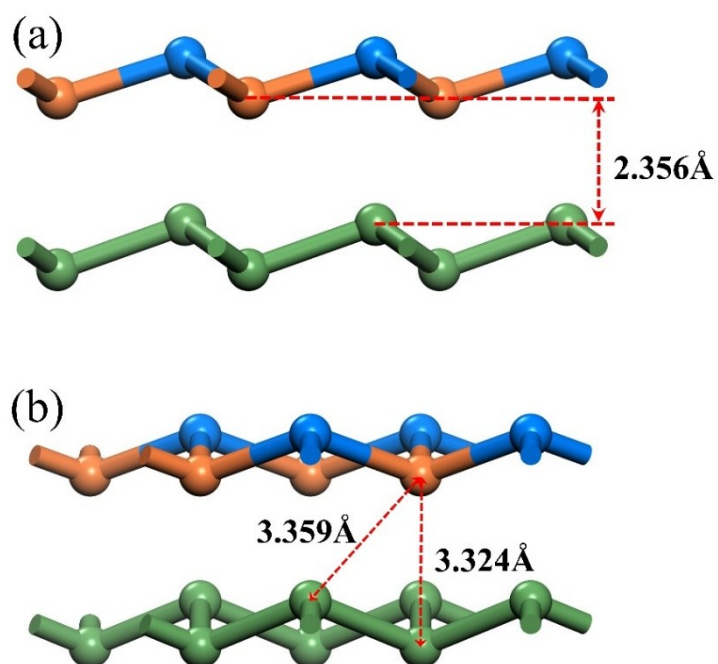

**Figure S2** schematic representations of distance between (a) interlayers and Cd atom and Ge atom.

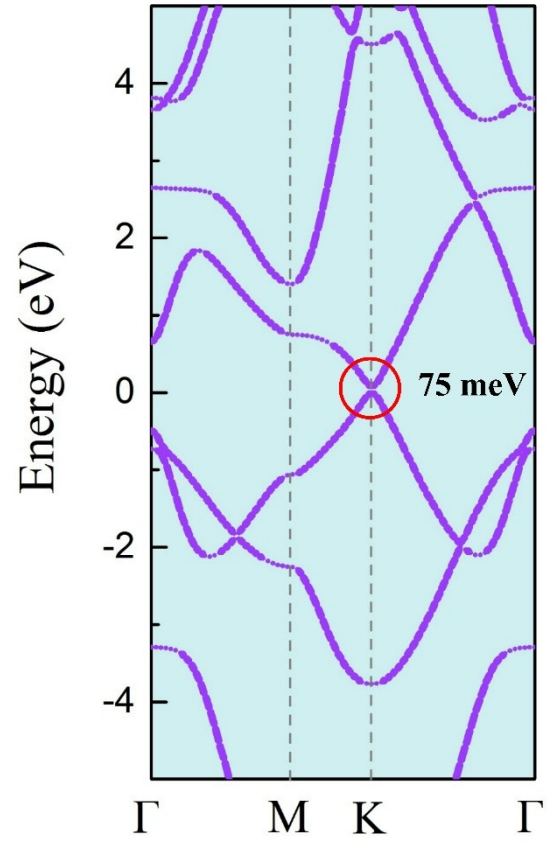

**Figure S3** Band structure for germanene under biaxial tensile strain of 2.5%.

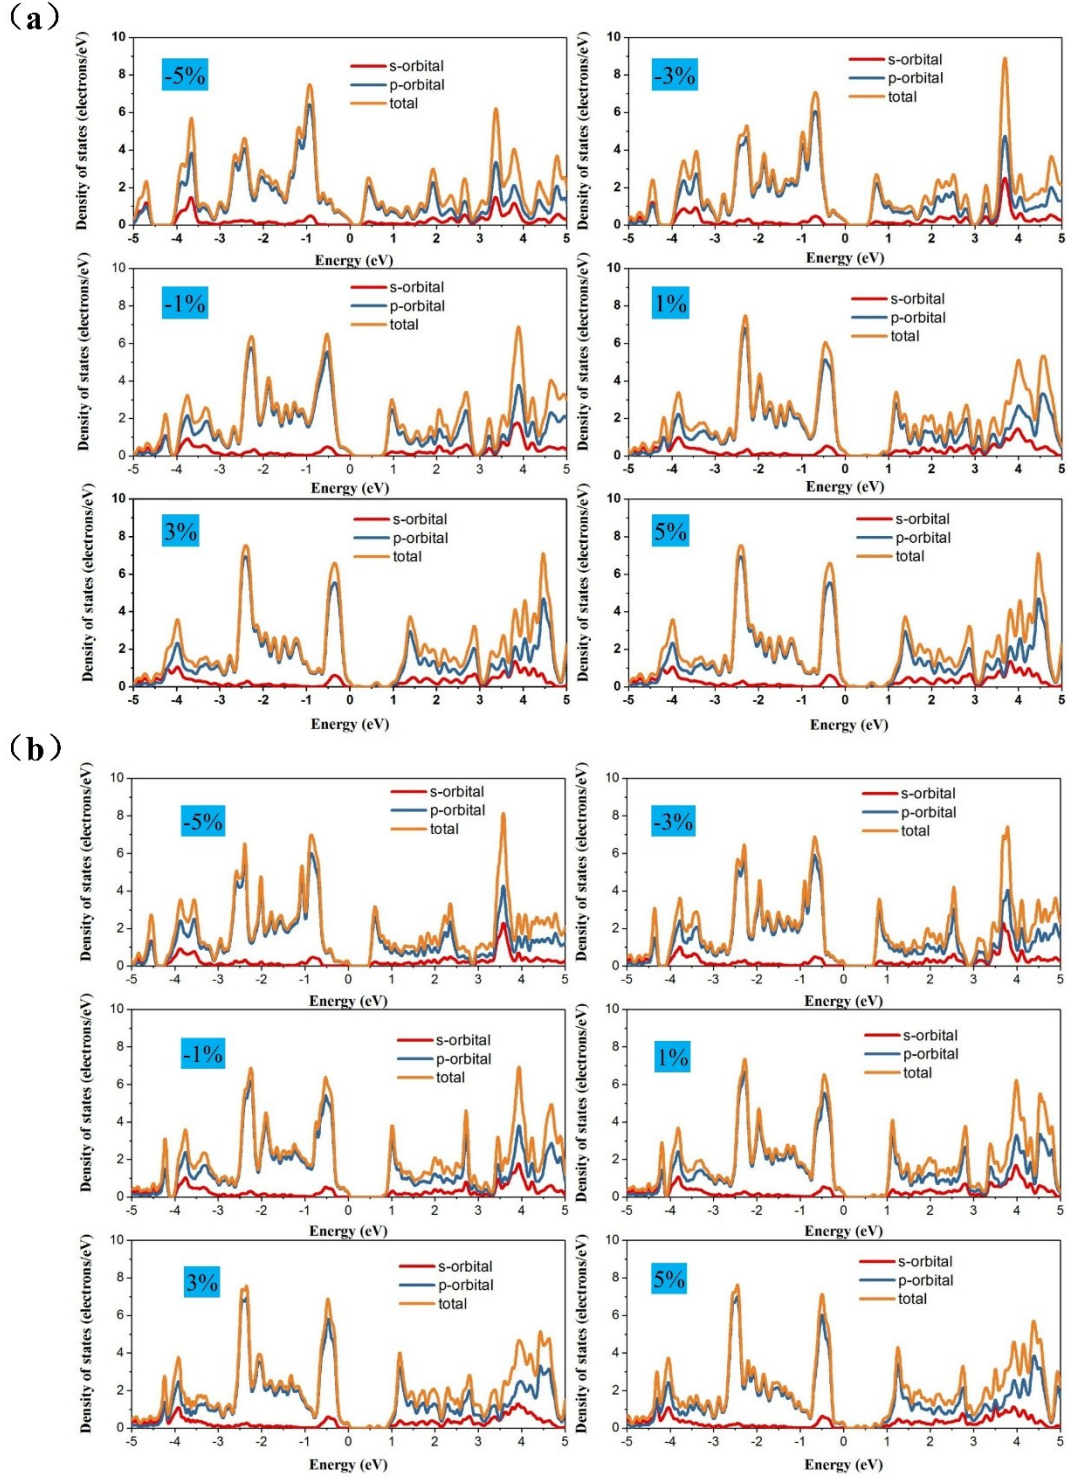

**Figure S4** DOS CdS/germanene heterojunction under (a) biaxial and (b) uniaxial strains.
